# Supplementary material for: Evaluating the association between urine drug screening frequency and retention in opioid agonist treatment in Ontario, Canada: a retrospective cohort study
Source: PubMed Central journal article supplement — BMJ Open. 2022 Oct 12;12(10):e060857. doi: 10.1136/bmjopen-2022-060857 (PMC9562722; doi:10.1136/bmjopen-2022-060857), 2022-10-12
Supplement: bmjopen-2022-060857supp001.pdf [file bmjopen-2022-060857supp001.pdf]

## Appendix A- Definition and ICD 9 and ICD10 codes for Mental Health Conditions

| Definition Mental Health Conditions |                                                                                                                                                                                                                                                                                                                                                                                                                                                                                                                                                                                                                                                                                                                  |                                                                                                                                                                                                                                                                                                                                                                                                                                                                                                                                                                                                                                                                                                                                                                                                                                                                                                                                                                                                                                                                                                                                                                                                                                                                                                                                                                                                                                               |                                                                                                                                                                                                                                                                                                                                                                                                                                                                                                                                                                                                                                                                                                                                                                                                                                                                                                                                                                                                                                                                                                                                                                                                                                                                                                                                                                                                                                                                                                                 |
|-------------------------------------|------------------------------------------------------------------------------------------------------------------------------------------------------------------------------------------------------------------------------------------------------------------------------------------------------------------------------------------------------------------------------------------------------------------------------------------------------------------------------------------------------------------------------------------------------------------------------------------------------------------------------------------------------------------------------------------------------------------|-----------------------------------------------------------------------------------------------------------------------------------------------------------------------------------------------------------------------------------------------------------------------------------------------------------------------------------------------------------------------------------------------------------------------------------------------------------------------------------------------------------------------------------------------------------------------------------------------------------------------------------------------------------------------------------------------------------------------------------------------------------------------------------------------------------------------------------------------------------------------------------------------------------------------------------------------------------------------------------------------------------------------------------------------------------------------------------------------------------------------------------------------------------------------------------------------------------------------------------------------------------------------------------------------------------------------------------------------------------------------------------------------------------------------------------------------|-----------------------------------------------------------------------------------------------------------------------------------------------------------------------------------------------------------------------------------------------------------------------------------------------------------------------------------------------------------------------------------------------------------------------------------------------------------------------------------------------------------------------------------------------------------------------------------------------------------------------------------------------------------------------------------------------------------------------------------------------------------------------------------------------------------------------------------------------------------------------------------------------------------------------------------------------------------------------------------------------------------------------------------------------------------------------------------------------------------------------------------------------------------------------------------------------------------------------------------------------------------------------------------------------------------------------------------------------------------------------------------------------------------------------------------------------------------------------------------------------------------------|
| Mental Health Conditions            | ICD-10 Codes (DX10CODE1)                                                                                                                                                                                                                                                                                                                                                                                                                                                                                                                                                                                                                                                                                         | ICD-9 Codes                                                                                                                                                                                                                                                                                                                                                                                                                                                                                                                                                                                                                                                                                                                                                                                                                                                                                                                                                                                                                                                                                                                                                                                                                                                                                                                                                                                                                                   | <a href="#">Go Back</a>                                                                                                                                                                                                                                                                                                                                                                                                                                                                                                                                                                                                                                                                                                                                                                                                                                                                                                                                                                                                                                                                                                                                                                                                                                                                                                                                                                                                                                                                                         |
| Neurodevelopmental Disorders        | <b>F90 Attention-deficit hyperactivity disorders</b><br><b>Includes:</b><br>attention deficit disorder with hyperactivity<br>attention deficit syndrome with hyperactivity<br><b>F90.0 Attention-deficit hyperactivity disorder, predominantly inattentive type</b><br><b>F90.1 Attention-deficit hyperactivity disorder, predominantly hyperactive type</b><br><b>F90.2 Attention-deficit hyperactivity disorder, combined type</b><br><b>F90.8 Attention-deficit hyperactivity disorder, other type</b><br><b>F90.9 Attention-deficit hyperactivity disorder, unspecified type</b><br>Attention-deficit hyperactivity disorder of childhood or adolescence NOS<br>Attention-deficit hyperactivity disorder NOS | <b>314.0 ATTENTION DEFICIT DIS*</b><br><br>314.00 Attention-Deficit/Hyperactivity Disorder, Predominantly Inattentive Type<br>314.01 Attention-Deficit/Hyperactivity Disorder, Combined Type or Attention-Deficit/Hyperactivity Disorder Predominantly Hyperactive-Impulsive Type<br>314.9 Attention-Deficit/Hyperactivity Disorder NOS                                                                                                                                                                                                                                                                                                                                                                                                                                                                                                                                                                                                                                                                                                                                                                                                                                                                                                                                                                                                                                                                                                       |                                                                                                                                                                                                                                                                                                                                                                                                                                                                                                                                                                                                                                                                                                                                                                                                                                                                                                                                                                                                                                                                                                                                                                                                                                                                                                                                                                                                                                                                                                                 |
|                                     | <b>Schizophrenia Spectrum and Related Disorders</b>                                                                                                                                                                                                                                                                                                                                                                                                                                                                                                                                                                                                                                                              | <b>Schizophrenia, schizotypal, delusional, and other non-mood psychotic disorders (F20-F29)</b><br><b>F20 Schizophrenia</b><br><b>F20.0 Paranoid schizophrenia</b> Paraphrenic schizophrenia<br><b>F20.1 Disorganized schizophrenia</b><br>Hebephrenic schizophrenia<br>Hebephrenia<br><b>F20.2 Catatonic schizophrenia</b><br>Schizophrenic catalepsy<br>Schizophrenic catatonia<br>Schizophrenic flexibilitas cerea<br><b>F20.3 Undifferentiated schizophrenia</b><br>Atypical schizophrenia<br><b>F20.5 Residual schizophrenia</b><br>Restzustand (schizophrenic)<br>Schizophrenic residual state<br><b>F20.8 Other schizophrenia</b><br><b>F20.81 Schizophreniform disorder</b><br>Schizophreniform psychosis NOS<br><b>F20.89 Other schizophrenia</b><br>Cenesthopathic schizophrenia<br>Simple schizophrenia<br><b>F20.9 Schizophrenia, unspecified</b><br><b>F21 Schizotypal disorder</b><br>Borderline schizophrenia<br>Latent schizophrenia<br>Latent schizophrenic reaction<br>Prepsychotic schizophrenia<br>Prodromal schizophrenia<br>Pseudoneurotic schizophrenia<br>Pseudopsychopathic schizophrenia<br>Schizotypal personality disorder<br><b>F22 Delusional disorders</b><br>Delusional dysmorphophobia<br>Involuntal paranoid state<br>Paranoia<br>Paranoia querulans<br>Paranoid psychosis<br>Paranoid state<br>Paraphrenia (late)<br>Sensitiver Beziehungswahn<br><b>F23 Brief psychotic disorder</b><br>Paranoid reaction | <b>295 SCHIZOPHRENIC DISORDERS*</b><br>295.0 SIMPLE SCHIZOPHRENIA*<br>295.00 SIMPLE SCHIZOPHREN-UNSPECIFIED<br>295.01 SIMPL SCHIZOPHREN-SUBCHR<br>295.02 SIMPLE SCHIZOPHREN-CHR<br>295.03 SIMP SCHIZ-SUBCHR/EXACER<br>295.04 SIMPL SCHIZO-CHR/EXACERB<br>295.05 SIMPL SCHIZOPHREN-REMISS<br>295.1 HEBEPHRENIA*<br>295.10 Schizophrenia, Disorganized Type<br>295.11 HEBEPHRENIA-SUBCHRONIC<br>295.12 HEBEPHRENIA-CHRONIC<br>295.13 HEBEPHREN-SUBCHR/EXACERB<br>295.14 HEBEPHRENIA-CHR/EXACERB<br>295.15 HEBEPHRENIA-REMISSION<br>295.2 CATATONIC SCHIZOPHRENIA*<br>295.20 Schizophrenia, Catatonic Type<br>295.21 CATATONIA-SUBCHRONIC<br>295.22 CATATONIA-CHRONIC<br>295.23 CATATONIA-SUBCHR/EXACERB<br>295.24 CATATONIA-CHR/EXACERB<br>295.25 CATATONIA-REMISSION<br>295.3 PARANOID SCHIZOPHRENIA*<br>295.30 Schizophrenia, Paranoid Type<br>295.31 PARANOID SCHIZO-SUBCHR<br>295.32 PARANOID SCHIZO-CHRONIC<br>295.33 PARAN SCHIZO-SUBCHR/EXAC<br>295.34 PARAN SCHIZO-CHR/EXACERB<br>295.35 PARANOID SCHIZO-REMISS<br>295.4 AC SCHIZOPHRENIC EPISODE*<br>295.40 Schizophreniform Disorder<br>295.41 AC SCHIZOPHRENIA-SUBCHR<br>295.42 AC SCHIZOPHRENIA-CHR<br>295.43 AC SCHIZO-SUBCHR/EXACERB<br>295.44 AC SCHIZOPHR-CHR/EXACERB<br>295.45 AC SCHIZOPHRENIA-REMISS<br>295.5 LATENT SCHIZOPHRENIA*<br>295.50 LATENT SCHIZOPHREN-UNSP<br>295.51 LAT SCHIZOPHREN-SUBCHR<br>295.52 LATENT SCHIZOPHREN-CHR<br>295.53 LAT SCHIZO-SUBCHR/EXACER<br>295.54 LATENT SCHIZO-CHR/EXACER<br>295.55 LAT SCHIZOPHREN-REMISS |

|                                      |                                                                                             |        |                                                                                  |
|--------------------------------------|---------------------------------------------------------------------------------------------|--------|----------------------------------------------------------------------------------|
|                                      | Psychogenic paranoid psychosis                                                              | 295.6  | RESIDUAL SCHIZOPHRENIA*                                                          |
|                                      | <b>F24 Shared psychotic disorder</b>                                                        | 295.60 | Schizophrenia, Residual Type                                                     |
|                                      | Folie à deux                                                                                | 295.61 | RESID SCHIZOPHREN-SUBCHR                                                         |
|                                      | Induced paranoid disorder                                                                   | 295.62 | RESIDUAL SCHIZOPHREN-CHR                                                         |
|                                      | Induced psychotic disorder                                                                  | 295.63 | RESID SCHIZO-SUBCHR/EXAC                                                         |
|                                      | <b>F25 Schizoaffective disorders</b>                                                        | 295.64 | RESID SCHIZO-CHR/EXACERB                                                         |
|                                      | <b>F25.0 Schizoaffective disorder, bipolar type</b>                                         | 295.65 | RESID SCHIZOPHREN-REMISS                                                         |
|                                      | Cyclic schizophrenia                                                                        | 295.7  | SCHIZOAFFECTIVE TYPE*                                                            |
|                                      | Schizoaffective disorder, manic type                                                        | 295.70 | Schizoaffective Disorder                                                         |
|                                      | Schizoaffective disorder, mixed type                                                        | 295.71 | SCHIZOAFFECTIVE-SUBCHR                                                           |
|                                      | Schizoaffective psychosis, bipolar type                                                     | 295.72 | SCHIZOAFFECTIVE-CHRONIC                                                          |
|                                      | Schizophreniform psychosis, manic type                                                      | 295.73 | SCHIZOAF-SUBCHR/EXACER                                                           |
|                                      | <b>F25.1 Schizoaffective disorder, depressive type</b>                                      | 295.74 | SCHIZOAFECT-CHR/EXACER                                                           |
|                                      | Schizoaffective psychosis, depressive type                                                  | 295.75 | SCHIZOAFFECTIVE-REMISS                                                           |
|                                      | Schizophreniform psychosis, depressive type                                                 | 295.8  | SCHIZOPHRENIA NEC*                                                               |
|                                      | <b>F25.8 Other schizoaffective disorders</b>                                                | 295.80 | SCHIZOPHRENIA NEC-UNSPEC                                                         |
|                                      | <b>F25.9 Schizoaffective disorder, unspecified</b>                                          | 295.81 | SCHIZOPHRENIA NEC-SUBCHR                                                         |
|                                      | Schizoaffective psychosis NOS                                                               | 295.82 | SCHIZOPHRENIA NEC-CHR                                                            |
|                                      | <b>F28 Other psychotic disorder not due to a substance or known physiological condition</b> | 295.83 | SCHIZO NEC-SUBCHR/EXACER                                                         |
|                                      | Chronic hallucinatory psychosis                                                             | 295.84 | SCHIZO NEC-CHR/EXACERB                                                           |
|                                      | <b>F29 Unspecified psychosis not due to a substance or known physiological condition</b>    | 295.85 | SCHIZOPHRENIA NEC-REMISS                                                         |
|                                      | Psychosis NOS                                                                               | 295.9  | SCHIZOPHRENIA NOS*                                                               |
|                                      |                                                                                             | 295.90 | Schizophrenia Undifferentiated Type                                              |
|                                      |                                                                                             | 295.91 | SCHIZOPHRENIA NOS-SUBCHR                                                         |
|                                      |                                                                                             | 295.92 | SCHIZOPHRENIA NOS-CHR                                                            |
|                                      |                                                                                             | 295.93 | SCHIZO NOS-SUBCHR/EXACER                                                         |
|                                      |                                                                                             | 295.94 | SCHIZO NOS-CHR/EXACERB                                                           |
|                                      |                                                                                             | 295.95 | SCHIZOPHRENIA NOS-REMISS                                                         |
|                                      |                                                                                             | 297.1  | Delusional Disorder                                                              |
|                                      |                                                                                             | 297.3  | Shared Psychotic Disorder                                                        |
|                                      |                                                                                             | 298.0  | REACT DEPRESS PSYCHOSIS                                                          |
|                                      |                                                                                             | 298.1  | EXCITATIV TYPE PSYCHOSIS                                                         |
|                                      |                                                                                             | 298.2  | REACTIVE CONFUSION                                                               |
|                                      |                                                                                             | 298.3  | ACUTE PARANOID REACTION                                                          |
|                                      |                                                                                             | 298.4  | PSYCHOGEN PARANOID PSYCH                                                         |
|                                      |                                                                                             | 298.8  | Brief Psychotic Disorder                                                         |
|                                      |                                                                                             | 298.9  | Psychotic Disorder NOS                                                           |
| <b>Bipolar and Related Disorders</b> | <b>F30 –F31 Manic episode</b>                                                               | 296.00 | Bipolar I Disorder, Single Manic Episode, Unspecified                            |
|                                      | <b>Includes:</b>                                                                            | 296.01 | Bipolar I Disorder, Single Manic Episode, Mild                                   |
|                                      | bipolar disorder, single manic episode                                                      |        |                                                                                  |
|                                      | mixed affective episode                                                                     |        |                                                                                  |
|                                      | <b>F30.1 Manic episode without psychotic symptoms</b>                                       | 296.02 | Bipolar I Disorder, Single Manic Episode, Moderate                               |
|                                      | <b>F30.10 Manic episode without psychotic symptoms, unspecified</b>                         | 296.03 | Bipolar I Disorder, Single Manic Episode, Severe Without Psychotic Features      |
|                                      | <b>F30.11 Manic episode without psychotic symptoms, mild</b>                                | 296.04 | Bipolar I Disorder, Single Manic Episode, Severe With Psychotic Features         |
|                                      | <b>F30.12 Manic episode without psychotic symptoms, moderate</b>                            | 296.05 | Bipolar I Disorder, Single Manic Episode, In Partial Remission                   |
|                                      | <b>F30.13 Manic episode, severe, without psychotic symptoms</b>                             | 296.06 | Bipolar I Disorder, Single Manic Episode, In Full Remission                      |
|                                      | <b>F30.2 Manic episode, severe with psychotic symptoms</b>                                  | 296.1  | MANIC, RECURRENT EPISODE*                                                        |
|                                      | Manic stupor                                                                                | 296.10 | RECUR MANIC DIS-UNSPEC                                                           |
|                                      | Mania with mood-congruent psychotic symptoms                                                | 296.11 | RECUR MANIC DIS-MILD                                                             |
|                                      | Mania with mood-incongruent psychotic symptoms                                              | 296.12 | RECUR MANIC DIS-MOD                                                              |
|                                      | <b>F30.3 Manic episode in partial remission</b>                                             | 296.13 | RECUR MANIC DIS-SEVERE                                                           |
|                                      | <b>F30.4 Manic episode in full remission</b>                                                | 296.14 | RECUR MANIC-SEV W PSYCHO                                                         |
|                                      | <b>F30.8 Other manic episodes</b>                                                           | 296.15 | RECUR MANIC-PART REMISS                                                          |
|                                      | Hypomania                                                                                   | 296.16 | RECUR MANIC-FULL REMISS                                                          |
|                                      | <b>F30.9 Manic episode, unspecified</b>                                                     | 296.4  | BIPOLAR AFFECTIVE, MANIC*                                                        |
|                                      | Mania NOS                                                                                   | 296.40 | Bipolar I Disorder, Most Recent Episode Hypomanic or Manic, Unspecified          |
|                                      | <b>F31 Bipolar disorder</b>                                                                 | 296.41 | Bipolar I Disorder, Most Recent Episode Manic, Mild                              |
|                                      | <b>Includes:</b>                                                                            | 296.42 | Bipolar I Disorder, Most Recent Episode Manic, Moderate                          |
|                                      | manic-depressive illness                                                                    |        |                                                                                  |
|                                      | manic-depressive psychosis                                                                  |        |                                                                                  |
|                                      | manic-depressive reaction                                                                   |        |                                                                                  |
|                                      | <b>F31.0 Bipolar disorder, current episode hypomanic</b>                                    | 296.43 | Bipolar I Disorder, Most Recent Episode Manic, Severe Without Psychotic Features |
|                                      | <b>F31.1 Bipolar disorder, current episode manic without psychotic features</b>             | 296.44 | Bipolar I Disorder, Most Recent Episode Manic, Severe With Psychotic Features    |

|                                                                                                   |                                                                                             |
|---------------------------------------------------------------------------------------------------|---------------------------------------------------------------------------------------------|
| <b>F31.10 Bipolar disorder, current episode manic without psychotic features, unspecified</b>     | 296.45 Bipolar I Disorder, Most Recent Episode Manic, In Partial Remission                  |
| <b>F31.11 Bipolar disorder, current episode manic without psychotic features, mild</b>            | 296.46 Bipolar I Disorder, Most Recent Episode Manic, In Full Remission                     |
| <b>F31.12 Bipolar disorder, current episode manic without psychotic features, moderate</b>        | 296.5 BIPOLAR AFFECT, DEPRESS*                                                              |
| <b>F31.13 Bipolar disorder, current episode manic without psychotic features, severe</b>          | 296.50 Bipolar I Disorder, Most Recent Episode Depressed, Unspecified                       |
| <b>F31.2 Bipolar disorder, current episode manic severe with psychotic features</b>               | 296.51 Bipolar I Disorder, Most Recent Episode Depressed, Mild                              |
| Bipolar disorder, current episode manic with mood-congruent psychotic symptoms                    | 296.52 Bipolar I Disorder, Most Recent Episode Depressed, Moderate                          |
| Bipolar disorder, current episode manic with mood-incongruent psychotic symptoms                  | 296.53 Bipolar I Disorder, Most Recent Episode Depressed, Severe Without Psychotic Features |
| <b>F31.3 Bipolar disorder, current episode depressed, mild or moderate severity</b>               | 296.54 Bipolar I Disorder, Most Recent Episode Depressed, Severe With Psychotic Features    |
| <b>F31.30 Bipolar disorder, current episode depressed, mild or moderate severity, unspecified</b> | 296.55 Bipolar I Disorder, Most Recent Episode Depressed, In Partial Remission              |
| <b>F31.31 Bipolar disorder, current episode depressed, mild</b>                                   | 296.56 Bipolar I Disorder, Most Recent Episode Depressed, In Full Remission                 |
| <b>F31.32 Bipolar disorder, current episode depressed, moderate</b>                               | 296.6 BIPOLAR AFFECTIVE, MIXED*                                                             |
| <b>F31.4 Bipolar disorder, current episode depressed, severe, without psychotic features</b>      | 296.60 Bipolar I Disorder, Most Recent Episode Mixed, Unspecified                           |
| <b>F31.5 Bipolar disorder, current episode depressed, severe, with psychotic features</b>         | 296.61 Bipolar I Disorder, Most Recent Episode Mixed, Mild                                  |
| Bipolar disorder, current episode depressed with mood-incongruent psychotic symptoms              | 296.62 Bipolar I Disorder, Most Recent Episode Mixed, Moderate                              |
| Bipolar disorder, current episode depressed with mood-congruent psychotic symptoms                | 296.63 Bipolar I Disorder, Most Recent Episode Mixed, Severe Without Psychotic Features     |
| <b>F31.6 Bipolar disorder, current episode mixed</b>                                              | 296.64 Bipolar I Disorder, Most Recent Episode Mixed, Severe With Psychotic Features        |
| <b>F31.60 Bipolar disorder, current episode mixed, unspecified</b>                                | 296.65 Bipolar I Disorder, Most Recent Episode Mixed, In Partial Remission                  |
| <b>F31.61 Bipolar disorder, current episode mixed, mild</b>                                       | 296.66 Bipolar I Disorder, Most Recent Episode Mixed, In Full Remission                     |
| <b>F31.62 Bipolar disorder, current episode mixed, moderate</b>                                   | 296.7 Bipolar I Disorder, Most Recent Episode Unspecified                                   |
| <b>F31.63 Bipolar disorder, current episode mixed, severe, without psychotic features</b>         | 296.8 MANIC-DEPRESSIVE NEC/NOS*                                                             |
| <b>F31.64 Bipolar disorder, current episode mixed, severe, with psychotic features</b>            | 296.80 Bipolar Disorder NOS                                                                 |
| Bipolar disorder, current episode mixed with mood-congruent psychotic symptoms                    | 296.81 ATYPICAL MANIC DISORDER                                                              |
| Bipolar disorder, current episode mixed with mood-incongruent psychotic symptoms                  | 296.82 ATYPICAL DEPRESSIVE DIS                                                              |
| <b>F31.7 Bipolar disorder, currently in remission</b>                                             | 296.89 Bipolar II Disorder                                                                  |
| <b>F31.70 Bipolar disorder, currently in remission, most recent episode unspecified</b>           |                                                                                             |
| <b>F31.71 Bipolar disorder, in partial remission, most recent episode hypomanic</b>               |                                                                                             |
| <b>F31.72 Bipolar disorder, in full remission, most recent episode hypomanic</b>                  |                                                                                             |
| <b>F31.73 Bipolar disorder, in partial remission, most recent episode manic</b>                   |                                                                                             |
| <b>F31.74 Bipolar disorder, in full remission, most recent episode manic</b>                      |                                                                                             |
| <b>F31.75 Bipolar disorder, in partial remission, most recent episode depressed</b>               |                                                                                             |
| <b>F31.76 Bipolar disorder, in full remission, most recent episode depressed</b>                  |                                                                                             |
| <b>F31.77 Bipolar disorder, in partial remission, most recent episode mixed</b>                   |                                                                                             |
| <b>F31.78 Bipolar disorder, in full remission, most recent episode mixed</b>                      |                                                                                             |
| <b>F31.8 Other bipolar disorders</b>                                                              |                                                                                             |
| <b>F31.81 Bipolar II disorder</b>                                                                 |                                                                                             |
| <b>F31.89 Other bipolar disorder</b>                                                              |                                                                                             |
| Recurrent manic episodes NOS                                                                      |                                                                                             |
| <b>F31.9 Bipolar disorder, unspecified</b>                                                        |                                                                                             |

|                                                                                        |                                                                                           |        |                                                                              |
|----------------------------------------------------------------------------------------|-------------------------------------------------------------------------------------------|--------|------------------------------------------------------------------------------|
| <b>Depressive Disorders</b>                                                            | <b>F32 Major depressive disorder, single episode</b>                                      | 296.2  | DEPR PSYCH, SINGL EPISOD*                                                    |
|                                                                                        | <b>Includes:</b>                                                                          | 296.20 | Major Depressive Disorder, Single Episode, Unspecified                       |
|                                                                                        | single episode of agitated depression                                                     | 296.21 | Major Depressive Disorder, Single Episode, Mild                              |
|                                                                                        | single episode of depressive reaction                                                     | 296.22 | Major Depressive Disorder, Single Episode, Moderate                          |
|                                                                                        | single episode of major depression                                                        | 296.23 | Major Depressive Disorder, Single Episode, Severe Without Psychotic Features |
|                                                                                        | single episode of psychogenic depression                                                  | 296.24 | Major Depressive Disorder, Single Episode, Severe With Psychotic Features    |
|                                                                                        | single episode of reactive depression                                                     | 296.25 | Major Depressive Disorder, Single Episode, In Partial Remission              |
|                                                                                        | single episode of vital depression                                                        | 296.26 | Major Depressive Disorder, Single Episode, In Full Remission                 |
|                                                                                        | <b>F32.0 Major depressive disorder, single episode, mild</b>                              | 296.3  | DEPR PSYCH, RECUR EPISOD*                                                    |
|                                                                                        | <b>F32.1 Major depressive disorder, single episode, moderate</b>                          | 296.30 | Major Depressive Disorder, Recurrent, Unspecified                            |
|                                                                                        | <b>F32.2 Major depressive disorder, single episode, severe without psychotic features</b> | 296.31 | Major Depressive Disorder, Recurrent, Mild                                   |
|                                                                                        | <b>F32.3 Major depressive disorder, single episode, severe with psychotic features</b>    | 296.32 | Major Depressive Disorder, Recurrent, Moderate                               |
|                                                                                        | Single episode of major depression with mood-congruent psychotic symptoms                 | 296.33 | Major Depressive Disorder, Recurrent, Severe Without Psychotic Features      |
|                                                                                        | Single episode of major depression with mood-incongruent psychotic symptoms               | 296.34 | Major Depressive Disorder, Recurrent, Severe With Psychotic Features         |
|                                                                                        | Single episode of major depression with psychotic symptoms                                | 296.35 | Major Depressive Disorder, Recurrent, In Partial Remission                   |
|                                                                                        | Single episode of psychogenic depressive psychosis                                        | 296.36 | Major Depressive Disorder, Recurrent, In Full Remission                      |
|                                                                                        | Single episode of psychotic depression                                                    |        |                                                                              |
|                                                                                        | Single episode of reactive depressive psychosis                                           |        |                                                                              |
|                                                                                        | <b>F32.4 Major depressive disorder, single episode, in partial remission</b>              | 296.90 | Mood Disorder NOS                                                            |
|                                                                                        | <b>F32.5 Major depressive disorder, single episode, in full remission</b>                 | 300.4  | Dysthymic Disorder                                                           |
|                                                                                        | <b>F32.8 Other depressive episodes</b>                                                    | 311    | Depressive Disorder NOS                                                      |
|                                                                                        | Atypical depression                                                                       |        |                                                                              |
|                                                                                        | Post-schizophrenic depression                                                             |        |                                                                              |
|                                                                                        | Single episode of 'masked' depression NOS                                                 |        |                                                                              |
|                                                                                        | <b>F32.9 Major depressive disorder, single episode, unspecified</b>                       |        |                                                                              |
|                                                                                        | Depression NOS                                                                            |        |                                                                              |
|                                                                                        | Depressive disorder NOS                                                                   |        |                                                                              |
|                                                                                        | Major depression NOS                                                                      |        |                                                                              |
|                                                                                        | <b>F33 Major depressive disorder, recurrent</b>                                           |        |                                                                              |
|                                                                                        | <b>Includes:</b>                                                                          |        |                                                                              |
|                                                                                        | recurrent episodes of depressive reaction                                                 |        |                                                                              |
| recurrent episodes of endogenous depression                                            |                                                                                           |        |                                                                              |
| recurrent episodes of major depression                                                 |                                                                                           |        |                                                                              |
| recurrent episodes of psychogenic depression                                           |                                                                                           |        |                                                                              |
| recurrent episodes of reactive depression                                              |                                                                                           |        |                                                                              |
| recurrent episodes of seasonal depressive disorder                                     |                                                                                           |        |                                                                              |
| recurrent episodes of vital depression                                                 |                                                                                           |        |                                                                              |
| <b>F33.0 Major depressive disorder, recurrent, mild</b>                                |                                                                                           |        |                                                                              |
| <b>F33.1 Major depressive disorder, recurrent, moderate</b>                            |                                                                                           |        |                                                                              |
| <b>F33.2 Major depressive disorder, recurrent severe without psychotic features</b>    |                                                                                           |        |                                                                              |
| <b>F33.3 Major depressive disorder, recurrent, severe with psychotic symptoms</b>      |                                                                                           |        |                                                                              |
| Endogenous depression with psychotic symptoms                                          |                                                                                           |        |                                                                              |
| Recurrent severe episodes of major depression with mood-congruent psychotic symptoms   |                                                                                           |        |                                                                              |
| Recurrent severe episodes of major depression with mood-incongruent psychotic symptoms |                                                                                           |        |                                                                              |
| Recurrent severe episodes of major depression with psychotic symptoms                  |                                                                                           |        |                                                                              |
| Recurrent severe episodes of psychogenic depressive psychosis                          |                                                                                           |        |                                                                              |
| Recurrent severe episodes of psychotic depression                                      |                                                                                           |        |                                                                              |
| Recurrent severe episodes of reactive depressive psychosis                             |                                                                                           |        |                                                                              |
| <b>F33.4 Major depressive disorder, recurrent, in remission</b>                        |                                                                                           |        |                                                                              |
| <b>F33.40 Major depressive disorder, recurrent, in remission, unspecified</b>          |                                                                                           |        |                                                                              |

|                                                   |                                                                                                                                                                                                                                                                                                                                                                                                                                                                                                                                                                                                                                                                                                                                                                                                                                                                                                                                                                                                                                                                                                                                                                                                                                                                                        |                                                                                                                                                                                                                                                                                                                                                                                                                                                                                                                                                                                                      |  |
|---------------------------------------------------|----------------------------------------------------------------------------------------------------------------------------------------------------------------------------------------------------------------------------------------------------------------------------------------------------------------------------------------------------------------------------------------------------------------------------------------------------------------------------------------------------------------------------------------------------------------------------------------------------------------------------------------------------------------------------------------------------------------------------------------------------------------------------------------------------------------------------------------------------------------------------------------------------------------------------------------------------------------------------------------------------------------------------------------------------------------------------------------------------------------------------------------------------------------------------------------------------------------------------------------------------------------------------------------|------------------------------------------------------------------------------------------------------------------------------------------------------------------------------------------------------------------------------------------------------------------------------------------------------------------------------------------------------------------------------------------------------------------------------------------------------------------------------------------------------------------------------------------------------------------------------------------------------|--|
|                                                   | <p><b>F33.41 Major depressive disorder, recurrent, in partial remission</b><br/> <b>F33.42 Major depressive disorder, recurrent, in full remission</b><br/> <b>F33.8 Other recurrent depressive disorders</b><br/> <b>F33.9 Major depressive disorder, recurrent, unspecified</b><br/>                     Monopolar depression NOS<br/> <b>F34 Persistent mood [affective] disorders</b><br/> <b>F34.0 Cyclothymic disorder</b><br/>                     Affective personality disorder<br/>                     Cycloid personality<br/>                     Cyclothymia<br/>                     Cyclothymic personality<br/> <b>F34.1 Dysthymic disorder</b><br/>                     Depressive neurosis<br/>                     Depressive personality disorder<br/>                     Dysthymia<br/>                     Neurotic depression<br/>                     Persistent anxiety depression<br/> <b>F34.8 Other persistent mood [affective] disorders</b><br/> <b>F34.9 Persistent mood [affective] disorder, unspecified</b><br/> <b>F39 Unspecified mood [affective] disorder</b><br/>                     Affective psychosis NOS</p>                                                                                                                             |                                                                                                                                                                                                                                                                                                                                                                                                                                                                                                                                                                                                      |  |
| <b>Anxiety Disorders</b>                          | <p><b>F40 Phobic anxiety disorders</b><br/> <b>F40.0 Agoraphobia</b><br/> <b>F40.00 Agoraphobia, unspecified</b><br/> <b>F40.01 Agoraphobia with panic disorder</b><br/>                     Panic disorder with agoraphobia<br/> <b>F40.02 Agoraphobia without panic disorder</b><br/> <b>F40.1 Social phobias</b><br/>                     Anthropophobia<br/>                     Social anxiety disorder of childhood<br/> <b>F40.10 Social phobia, unspecified</b><br/> <b>F40.11 Social phobia, generalized</b><br/> <b>F41.0 Panic disorder [episodic paroxysmal anxiety] without agoraphobia</b><br/>                     Panic attack<br/>                     Panic state<br/> <b>F41.1 Generalized anxiety disorder</b><br/>                     Anxiety neurosis<br/>                     Anxiety reaction<br/>                     Anxiety state<br/>                     Overanxious disorder<br/> <b>F41.3 Other mixed anxiety disorders</b><br/> <b>F41.8 Other specified anxiety disorders</b><br/>                     Anxiety depression (mild or not persistent)<br/>                     Anxiety hysteria<br/>                     Mixed anxiety and depressive disorder<br/> <b>F41.9 Anxiety disorder, unspecified</b><br/>                     Anxiety NOS</p> | <p>300.0 ANXIETY STATES*<br/>                     300.00 Anxiety Disorder NOS<br/>                     300.01 Panic Disorder Without Agoraphobia<br/>                     300.02 Generalized Anxiety Disorder<br/>                     300.09 ANXIETY STATE NEC<br/>                     300.2 PHOBIC DISORDERS*<br/>                     300.20 PHOBIA NOS<br/>                     300.21 Panic Disorder With Agoraphobia<br/>                     300.22 Agoraphobia Without History of Panic Disorder<br/>                     300.23 Social Phobia</p>                                          |  |
| <b>Obsessive-Compulsive and Related Disorders</b> | <p><b>F42 Obsessive-compulsive disorder</b><br/>                     Anancastic neurosis<br/>                     Obsessive-compulsive neurosis</p>                                                                                                                                                                                                                                                                                                                                                                                                                                                                                                                                                                                                                                                                                                                                                                                                                                                                                                                                                                                                                                                                                                                                    | <p>300.3 Obsessive-Compulsive Disorder<br/>                     312.39 Trichotillomania</p>                                                                                                                                                                                                                                                                                                                                                                                                                                                                                                          |  |
| <b>Trauma and Stressor-Related Disorders</b>      | <p><b>F43 Reaction to severe stress, and adjustment disorders</b><br/> <b>F43.0 Acute stress reaction</b><br/>                     Acute crisis reaction<br/>                     Acute reaction to stress<br/>                     Combat and operational stress reaction<br/>                     Combat fatigue<br/>                     Crisis state<br/>                     Psychic shock<br/> <b>F43.1 Post-traumatic stress disorder (PTSD)</b><br/>                     Traumatic neurosis<br/> <b>F43.10 Post-traumatic stress disorder, unspecified</b><br/> <b>F43.11 Post-traumatic stress disorder, acute</b><br/> <b>F43.12 Post-traumatic stress disorder, chronic</b></p>                                                                                                                                                                                                                                                                                                                                                                                                                                                                                                                                                                                             | <p><b>308 Acute reaction to stress</b><br/> <b>309 Adjustment reaction</b><br/>                     308 ACUTE REACTION TO STRESS*<br/>                     308.0 STRESS REACT, EMOTIONAL<br/>                     308.1 STRESS REACTION, FUGUE<br/>                     308.2 STRESS REACT, PSYCHOMOT<br/>                     308.3 Acute Stress Disorder<br/>                     308.4 STRESS REACT, MIXED DIS<br/>                     308.9 ACUTE STRESS REACT NOS<br/>                     309 ADJUSTMENT REACTION*<br/>                     309.0 Adjustment Disorder With Depressed Mood</p> |  |

|                                                                  |                                                                                                                                                                                                                                                                                                                                                                                                                                                                                                                                                                                                                                                                                                                                                                                                                                                                                                                                                                                                                                                                                                                                                                                                                                                                                                                                                                                                                                                                                    |                                                                                                                                                                                                                                                                                                                                                                                                                                                                                                                                                                                                                                                                                                                                                                                                                                                                                                                                                                                                                                                                                                   |
|------------------------------------------------------------------|------------------------------------------------------------------------------------------------------------------------------------------------------------------------------------------------------------------------------------------------------------------------------------------------------------------------------------------------------------------------------------------------------------------------------------------------------------------------------------------------------------------------------------------------------------------------------------------------------------------------------------------------------------------------------------------------------------------------------------------------------------------------------------------------------------------------------------------------------------------------------------------------------------------------------------------------------------------------------------------------------------------------------------------------------------------------------------------------------------------------------------------------------------------------------------------------------------------------------------------------------------------------------------------------------------------------------------------------------------------------------------------------------------------------------------------------------------------------------------|---------------------------------------------------------------------------------------------------------------------------------------------------------------------------------------------------------------------------------------------------------------------------------------------------------------------------------------------------------------------------------------------------------------------------------------------------------------------------------------------------------------------------------------------------------------------------------------------------------------------------------------------------------------------------------------------------------------------------------------------------------------------------------------------------------------------------------------------------------------------------------------------------------------------------------------------------------------------------------------------------------------------------------------------------------------------------------------------------|
|                                                                  | <p><b>F43.2 Adjustment disorders</b><br/>                 Culture shock<br/>                 Grief reaction<br/>                 Hospitalism in children<br/> <b>F43.20 Adjustment disorder, unspecified</b><br/> <b>F43.21 Adjustment disorder with depressed mood</b><br/> <b>F43.22 Adjustment disorder with anxiety</b><br/> <b>F43.23 Adjustment disorder with mixed anxiety and depressed mood</b><br/> <b>F43.24 Adjustment disorder with disturbance of conduct</b><br/> <b>F43.25 Adjustment disorder with mixed disturbance of emotions and conduct</b><br/> <b>F43.29 Adjustment disorder with other symptoms</b><br/> <b>F43.8 Other reactions to severe stress</b><br/> <b>F43.9 Reaction to severe stress, unspecified</b></p>                                                                                                                                                                                                                                                                                                                                                                                                                                                                                                                                                                                                                                                                                                                                       | <p>309.1 PROLONG DEPRESSIVE REACT<br/>                 309.2 ADJUST REACT/OTH EMOTION*<br/>                 309.21 Separation Anxiety Disorder<br/>                 309.22 EMANCIPATION DISORDER<br/>                 309.23 ACADEMIC/WORK INHIBITION<br/>                 309.24 Adjustment Disorder With Anxiety<br/>                 309.28 Adjustment Disorder With Mixed Anxiety and Depressed Mood<br/>                 309.29 ADJ REACT-EMOTION NEC<br/>                 309.3 Adjustment Disorder With Disturbance of Conduct<br/>                 309.4 Adjustment Disorder With Mixed Disturbance of Emotions and Conduct<br/>                 309.8 OTHER ADJUST REACTION*<br/> <b>309.81 Posttraumatic Stress Disorder</b><br/>                 309.82 ADJUST REACT-PHYS SYMPT<br/>                 309.83 ADJUST REACT-WITHDRAWAL<br/>                 309.89 ADJUSTMENT REACTION NEC<br/>                 309.9 Adjustment Disorder Unspecified</p>                                                                                                                                 |
| <p><b>Feeding and Eating Disorders</b></p>                       | <p><b>F50 Eating disorders</b><br/> <b>F50.00 Anorexia nervosa</b><br/>                 F50.01 Anorexia nervosa, unspecified<br/> <b>F50.02 Anorexia nervosa, restricting type</b><br/> <b>F50.03 Anorexia nervosa, binge eating/purging type</b><br/> <b>F50.2 Bulimia nervosa</b><br/>                 Bulimia NOS<br/>                 Hyperorexia nervosa<br/> <b>F50.9 Eating disorder, unspecified</b><br/>                 Atypical anorexia nervosa<br/>                 Atypical bulimia nervosa</p>                                                                                                                                                                                                                                                                                                                                                                                                                                                                                                                                                                                                                                                                                                                                                                                                                                                                                                                                                                      | <p>307.1 Anorexia Nervosa<br/>                 307.5 EATING DISORDERS NEC/NOS*<br/>                 307.50 Eating Disorder NOS<br/>                 307.51 Bulimia Nervosa</p>                                                                                                                                                                                                                                                                                                                                                                                                                                                                                                                                                                                                                                                                                                                                                                                                                                                                                                                    |
| <p><b>Gender Dysphoria</b></p>                                   | <p><b>F64 Gender identity disorders</b><br/> <b>F64.1 Gender identity disorder in adolescence and adulthood</b><br/>                 Dual role transvestism<br/>                 Transsexualism<br/> <b>F64.2 Gender identity disorder of childhood</b><br/> <b>F64.8 Other gender identity disorders</b><br/> <b>F64.9 Gender identity disorder, unspecified</b><br/>                 Gender-role disorder NOS</p>                                                                                                                                                                                                                                                                                                                                                                                                                                                                                                                                                                                                                                                                                                                                                                                                                                                                                                                                                                                                                                                                | <p>302.5 TRANS-SEXUALISM*<br/>                 302.50 TRANS-SEXUALISM NOS<br/>                 302.51 TRANS-SEXUALISM, ASEXUAL<br/>                 302.52 TRANS-SEXUAL, HOMOSEXUAL<br/>                 302.53 TRANS-SEX, HETEROSEXUAL<br/>                 302.6 Gender Identity Disorder in Children or Gender Identity Disorder NOS<br/>                 302.85 Gender Identity Disorder in Adolescents or Adults</p>                                                                                                                                                                                                                                                                                                                                                                                                                                                                                                                                                                                                                                                                         |
| <p><b>Disruptive, Impulse-Control, and Conduct Disorders</b></p> | <p><b>Behavioral and emotional disorders with onset usually occurring in childhood and adolescence (F90-F98)</b><br/>                 Codes within categories F90-F98 may be used regardless of the age of a patient. These disorders generally have onset within the childhood or adolescent years, but may continue throughout life or not be diagnosed until adulthood<br/> <b>F91 Conduct disorders</b><br/> <b>F91.0 Conduct disorder confined to family context</b><br/> <b>F91.1 Conduct disorder, childhood-onset type</b><br/>                 Unsocialized conduct disorder<br/>                 Conduct disorder, solitary aggressive type<br/>                 Unsocialized aggressive disorder<br/> <b>F91.2 Conduct disorder, adolescent-onset type</b><br/>                 Socialized conduct disorder<br/>                 Conduct disorder, group type<br/> <b>F91.3 Oppositional defiant disorder</b><br/> <b>F91.8 Other conduct disorders</b><br/> <b>F91.9 Conduct disorder, unspecified</b><br/>                 Behavioral disorder NOS<br/>                 Conduct disorder NOS<br/>                 Disruptive behavior disorder NOS<br/> <b>F63 Impulse disorders</b><br/> <b>Excludes2:</b><br/>                 habitual excessive use of alcohol or psychoactive substances (F10-F19)<br/>                 impulse disorders involving sexual behavior (F65.-)<br/> <b>F63.0 Pathological gambling</b><br/>                 Compulsive gambling</p> | <p>312 Disturbance of conduct, not elsewhere classified<br/>                 312.3 IMPULSE CONTROL DIS NEC*<br/>                 312.30 Impulse-Control Disorder NOS<br/> <br/>                 312.81 Conduct Disorder, Childhood-Onset Type<br/>                 312.82 Conduct Disorder, Adolescent-Onset Type<br/>                 312.89 Conduct Disorder, Unspecified Onset<br/>                 312.9 Disruptive Behavior Disorder NOS<br/> <br/>                 312.20 SOCIAL CONDUCT DIS-UNSP<br/>                 312.21 SOCIAL CONDUCT DIS-MILD<br/>                 312.22 SOCIAL CONDUCT DIS-MOD<br/>                 312.23 SOCIAL CONDUCT DIS-SEV<br/>                 312.3 IMPULSE CONTROL DIS NEC*<br/>                 312.30 Impulse-Control Disorder NOS<br/>                 312.31 Pathological Gambling<br/>                 312.32 Kleptomania<br/>                 312.33 Pyromania<br/>                 312.34 Intermittent Explosive Disorder<br/>                 312.35 ISOLATED EXPLOSIVE DIS<br/> <br/>                 313.81 Oppositional Defiant Disorder</p> |

|                         |                                                                                                                                                                                                                                                                                                                                                                                                                                                                                                                                                                                                                                                                                                                                                                                                                                                                                                                                                                                                                                                                                                                                                                                                                                                                                                                                                                                                                                                                                                                                                                                                                                                                               |                                                                                                                                                                                                                                                                                                                                                                                                                                                                                                                                                                                                                                                                                                                                                                                                                                                                                                                                                                                                                                                              |
|-------------------------|-------------------------------------------------------------------------------------------------------------------------------------------------------------------------------------------------------------------------------------------------------------------------------------------------------------------------------------------------------------------------------------------------------------------------------------------------------------------------------------------------------------------------------------------------------------------------------------------------------------------------------------------------------------------------------------------------------------------------------------------------------------------------------------------------------------------------------------------------------------------------------------------------------------------------------------------------------------------------------------------------------------------------------------------------------------------------------------------------------------------------------------------------------------------------------------------------------------------------------------------------------------------------------------------------------------------------------------------------------------------------------------------------------------------------------------------------------------------------------------------------------------------------------------------------------------------------------------------------------------------------------------------------------------------------------|--------------------------------------------------------------------------------------------------------------------------------------------------------------------------------------------------------------------------------------------------------------------------------------------------------------------------------------------------------------------------------------------------------------------------------------------------------------------------------------------------------------------------------------------------------------------------------------------------------------------------------------------------------------------------------------------------------------------------------------------------------------------------------------------------------------------------------------------------------------------------------------------------------------------------------------------------------------------------------------------------------------------------------------------------------------|
|                         | <p><b>F63.1 Pyromania</b><br/>Pathological fire-setting</p> <p><b>F63.2 Kleptomania</b><br/>Pathological stealing</p> <p><b>F63.3 Trichotillomania</b><br/>Hair plucking</p> <p><b>F63.8 Other impulse disorders</b></p> <p><b>F63.81 Intermittent explosive disorder</b></p> <p><b>F63.89 Other impulse disorders</b></p> <p><b>F63.9 Impulse disorder, unspecified</b><br/>Impulse control disorder NOS</p>                                                                                                                                                                                                                                                                                                                                                                                                                                                                                                                                                                                                                                                                                                                                                                                                                                                                                                                                                                                                                                                                                                                                                                                                                                                                 |                                                                                                                                                                                                                                                                                                                                                                                                                                                                                                                                                                                                                                                                                                                                                                                                                                                                                                                                                                                                                                                              |
| Personality Disorders   | <p><b>F60</b></p> <p><b>F60.1 Schizoid personality disorder</b></p> <p><b>F60.2 Antisocial personality disorder</b><br/>Amoral personality (disorder)<br/>Asocial personality (disorder)<br/>Dissocial personality disorder<br/>Psychopathic personality (disorder)<br/>Sociopathic personality (disorder)</p> <p><b>F60.3 Borderline personality disorder</b><br/>Aggressive personality (disorder)<br/>Emotionally unstable personality disorder<br/>Explosive personality (disorder)</p> <p><b>F60.4 Histrionic personality disorder</b><br/>Hysterical personality (disorder)<br/>Psychoinfantile personality (disorder)</p> <p><b>F60.5 Obsessive-compulsive personality disorder</b><br/>Anankastic personality (disorder)<br/>Compulsive personality (disorder)<br/>Obsessional personality (disorder)<br/>obsessive-compulsive disorder (F42)</p> <p><b>F60.6 Avoidant personality disorder</b><br/>Anxious personality disorder</p> <p><b>F60.7 Dependent personality disorder</b><br/>Asthenic personality (disorder)<br/>Inadequate personality (disorder)<br/>Passive personality (disorder)</p> <p><b>F60.8 Other specific personality disorders</b></p> <p><b>F60.81 Narcissistic personality disorder</b></p> <p><b>F60.89 Other specific personality disorders</b><br/>Eccentric personality disorder<br/>'Haltlose' type personality disorder<br/>Immature personality disorder<br/>Passive-aggressive personality disorder<br/>Psychoneurotic personality disorder<br/>Self-defeating personality disorder</p> <p><b>F60.9 Personality disorder, unspecified</b><br/>Character disorder NOS<br/>Character neurosis NOS<br/>Pathological personality NOS</p> | <p><b>301 PERSONALITY DISORDERS*</b></p> <p>301.0 Paranoid Personality Disorder</p> <p>301.1 AFFECTIVE PERSONALITY*</p> <p>301.10 AFFECTIV PERSONALITY NOS</p> <p>301.11 CHRONIC HYPOMANIC PERSON</p> <p>301.12 CHR DEPRESSIVE PERSON</p> <p>301.13 Cyclothymic Disorder</p> <p>301.2 SCHIZOID PERSONALITY*</p> <p>301.20 Schizoid Personality Disorder</p> <p>301.21 INTROVERTED PERSONALITY</p> <p>301.22 Schizotypal Personality Disorder</p> <p>301.3 EXPLOSIVE PERSONALITY</p> <p>301.4 Obsessive-Compulsive Personality Disorder</p> <p>301.50 Histrionic Personality Disorder</p> <p>301.51 CHR FACTITIOUS ILLNESS</p> <p>301.59 HISTRIONIC PERSON NEC</p> <p>301.6 Dependent Personality Disorder</p> <p>301.7 Antisocial Personality Disorder</p> <p>301.8 OTHER PERSONALITY DIS*</p> <p>301.81 Narcissistic Personality Disorder</p> <p>301.82 Avoidant Personality Disorder</p> <p>301.83 Borderline Personality Disorder</p> <p>301.84 PASSIVE-AGGRESSIV PERSON</p> <p>301.89 PERSONALITY DISORDER NEC</p> <p>301.9 Personality Disorder NOS</p> |
| Substance Use Disorders | F10-F19                                                                                                                                                                                                                                                                                                                                                                                                                                                                                                                                                                                                                                                                                                                                                                                                                                                                                                                                                                                                                                                                                                                                                                                                                                                                                                                                                                                                                                                                                                                                                                                                                                                                       | <b>303 Alcohol dependence syndrome</b>                                                                                                                                                                                                                                                                                                                                                                                                                                                                                                                                                                                                                                                                                                                                                                                                                                                                                                                                                                                                                       |

---

**304 Drug dependence**  
**305 Nondependent abuse of drugs**

|        |                                                 |
|--------|-------------------------------------------------|
| 303    | ALCOHOL DEPENDENCE SYNDR*                       |
| 303.0  | AC ALCOHOL INTOXICATION*                        |
| 303.00 | Alcohol Intoxication                            |
| 303.01 | AC ALCOHOL INTOX-CONTIN                         |
| 303.02 | AC ALCOHOL INTOX-EPISOD                         |
| 303.03 | AC ALCOHOL INTOX-REMISS                         |
| 303.9  | ALCOHOL DEPEND NEC/NOS*                         |
| 303.90 | Alcohol Dependence                              |
| 303.91 | ALCOH DEP NEC/NOS-CONTIN                        |
| 303.92 | ALCOH DEP NEC/NOS-EPISOD                        |
| 303.93 | ALCOH DEP NEC/NOS-REMISS                        |
| 304    | DRUG DEPENDENCE*                                |
| 304.0  | OPIOID TYPE DEPENDENCE*                         |
| 304.00 | Opioid Dependence                               |
| 304.01 | OPIOID DEPEND-CONTIN                            |
| 304.02 | OPIOID DEPENDENCE-EPISOD                        |
| 304.03 | OPIOID DEPENDENCE-REMISS                        |
| 304.1  | BARBITURATE DEPENDENCE*                         |
| 304.10 | Sedative, Hypnotic, or Anxiolytic Dependence    |
| 304.11 | BARBITURAT DEPEND-CONTIN                        |
| 304.12 | BARBITURAT DEPEND-EPISOD                        |
| 304.13 | BARBITURAT DEPEND-REMISS                        |
| 304.2  | COCAINE DEPENDENCE*                             |
| 304.20 | Cocaine Dependence                              |
| 304.21 | COCAINE DEPEND-CONTIN                           |
| 304.22 | COCAINE DEPEND-EPISODIC                         |
| 304.23 | COCAINE DEPEND-REMISS                           |
| 304.3  | CANNABIS DEPENDENCE*                            |
| 304.30 | Cannabis Dependence                             |
| 304.31 | CANNABIS DEPEND-CONTIN                          |
| 304.32 | CANNABIS DEPEND-EPISODIC                        |
| 304.33 | CANNABIS DEPEND-REMISS                          |
| 304.4  | AMPHETAMINE DEPENDENCE*                         |
| 304.40 | Amphetamine Dependence                          |
| 304.41 | AMPHETAMIN DEPEND-CONTIN                        |
| 304.42 | AMPHETAMIN DEPEND-EPISOD                        |
| 304.43 | AMPHETAMIN DEPEND-REMISS                        |
| 304.5  | HALLUCINOGEN DEPENDENCE*                        |
| 304.50 | Hallucinogen Dependence                         |
| 304.51 | HALLUCINOGEN DEP-CONTIN                         |
| 304.52 | HALLUCINOGEN DEP-EPISOD                         |
| 304.53 | HALLUCINOGEN DEP-REMISS                         |
| 304.6  | DRUG DEPENDENCE NEC*                            |
| 304.60 | Inhalant Dependence or Phencyclidine Dependence |
| 304.61 | DRUG DEPEND NEC-CONTIN                          |
| 304.62 | DRUG DEPEND NEC-EPISODIC                        |
| 304.63 | DRUG DEPEND NEC-IN REM                          |
| 304.7  | OPIOID/OTHER DRUG DEPEND*                       |
| 304.70 | OPIOID/OTHER DEP-UNSPEC                         |
| 304.71 | OPIOID/OTHER DEP-CONTIN                         |
| 304.72 | OPIOID/OTHER DEP-EPISOD                         |
| 304.73 | OPIOID/OTHER DEP-REMISS                         |
| 304.8  | COMB DRUG DEPENDENCE NEC*                       |
| 304.80 | Polysubstance Dependence                        |
| 304.81 | COMB DRUG DEP NEC-CONTIN                        |
| 304.82 | COMB DRUG DEP NEC-EPISOD                        |
| 304.83 | COMB DRUG DEP NEC-REMISS                        |
| 304.9  | DRUG DEPENDENCE NOS*                            |
| 304.90 | Other (or Unknown) Substance Dependence         |
| 304.91 | DRUG DEPEND NOS-CONTIN                          |
| 304.92 | DRUG DEPEND NOS-EPISODIC                        |
| 304.93 | DRUG DEPEND NOS-REMISS                          |



---

|        |                                                                                                                                               |
|--------|-----------------------------------------------------------------------------------------------------------------------------------------------|
| 305    | NONDEPENDENT DRUG ABUSE*                                                                                                                      |
| 305.0  | ALCOHOL ABUSE*                                                                                                                                |
| 305.00 | Alcohol Abuse                                                                                                                                 |
| 305.01 | ALCOHOL ABUSE-CONTINUOUS                                                                                                                      |
| 305.02 | ALCOHOL ABUSE-EPISODIC                                                                                                                        |
| 305.03 | ALCOHOL ABUSE-IN REMISS                                                                                                                       |
| 305.1  | Nicotine Dependence                                                                                                                           |
| 305.2  | CANNABIS ABUSE*                                                                                                                               |
| 305.20 | Cannabis Abuse                                                                                                                                |
| 305.21 | CANNABIS ABUSE-CONTIN                                                                                                                         |
| 305.22 | CANNABIS ABUSE-EPISODIC                                                                                                                       |
| 305.23 | CANNABIS ABUSE-IN REMISS                                                                                                                      |
| 305.3  | HALLUCINOGEN ABUSE*                                                                                                                           |
| 305.30 | Hallucinogen Abuse                                                                                                                            |
| 305.31 | HALLUCINOGEN ABUSE-CONTIN                                                                                                                     |
| 305.32 | HALLUCINOGEN ABUSE-EPISOD                                                                                                                     |
| 305.33 | HALLUCINOGEN ABUSE-REMISS                                                                                                                     |
| 305.4  | BARBITURATE ABUSE*                                                                                                                            |
| 305.40 | Sedative, Hypnotic, or Anxiolytic Abuse                                                                                                       |
| 305.41 | BARBITURATE ABUSE-CONTIN                                                                                                                      |
| 305.42 | BARBITURATE ABUSE-EPISOD                                                                                                                      |
| 305.43 | BARBITURATE ABUSE-REMISS                                                                                                                      |
| 305.5  | OPIOID ABUSE*                                                                                                                                 |
| 305.50 | Opioid Abuse                                                                                                                                  |
| 305.51 | OPIOID ABUSE-CONTINUOUS                                                                                                                       |
| 305.52 | OPIOID ABUSE-EPISODIC                                                                                                                         |
| 305.53 | OPIOID ABUSE-IN REMISS                                                                                                                        |
| 305.6  | COCAINE ABUSE*                                                                                                                                |
| 305.60 | Cocaine Abuse                                                                                                                                 |
| 305.61 | COCAINE ABUSE-CONTINUOUS                                                                                                                      |
| 305.62 | COCAINE ABUSE-EPISODIC                                                                                                                        |
| 305.63 | COCAINE ABUSE-IN REMISS                                                                                                                       |
| 305.7  | AMPHETAMINE ABUSE*                                                                                                                            |
| 305.70 | Amphetamine Abuse                                                                                                                             |
| 305.71 | AMPHETAMINE ABUSE-CONTIN                                                                                                                      |
| 305.72 | AMPHETAMINE ABUSE-EPISOD                                                                                                                      |
| 305.73 | AMPHETAMINE ABUSE-REMISS                                                                                                                      |
| 305.8  | ANTIDEPRESSANT ABUSE*                                                                                                                         |
| 305.80 | ANTIDEPRESS ABUSE-UNSPEC                                                                                                                      |
| 305.81 | ANTIDEPRESS ABUSE-CONTIN                                                                                                                      |
| 305.82 | ANTIDEPRESS ABUSE-EPISOD                                                                                                                      |
| 305.83 | ANTIDEPRESS ABUSE-REMISS                                                                                                                      |
| 305.9  | DRUG ABUSE NEC/NOS*                                                                                                                           |
| 305.90 | Phencyclidine Abuse, Inhalant Abuse,<br>Other (or Unknown) Substance Abuse                                                                    |
| 305.91 | DRUG ABUSE NEC-CONTIN                                                                                                                         |
| 305.92 | DRUG ABUSE NEC-EPISODIC                                                                                                                       |
| 305.93 | DRUG ABUSE NEC-IN REMISS                                                                                                                      |
| 291.3  | Alcohol-Induced Psychotic Disorder, With<br>Hallucinations                                                                                    |
| 291.4  | PATHOLOGIC ALCOHOL INTOX                                                                                                                      |
| 291.5  | Alcohol-Induced Psychotic Disorder, With<br>Delusions                                                                                         |
| 291.8  | ALCOHOLIC PSYCHOSIS NEC*                                                                                                                      |
| 291.81 | Alcohol Withdrawal                                                                                                                            |
| 291.82 | Alcohol-Induced Sleep Disorder                                                                                                                |
| 291.89 | Alcohol-Induced Mood Disorder;<br>Alcohol-Induced Sexual Dysfunction; Alcohol-<br>Induced Sleep Disorder; Alcohol-Induced Anxiety<br>Disorder |
| 291.9  | Alcohol-Related Disorder NOS                                                                                                                  |
| 292    | DRUG PSYCHOSES*                                                                                                                               |
| 292.0  | Amphetamine, Cocaine, Nicotine, Opioid,<br>or Other (or Unknown)] Withdrawal; Sedative,<br>Hypnotic or Anxiolytic Withdrawal                  |
| 292.1  | DRUG PARANOID/HALLUCINOS*                                                                                                                     |
| 292.11 | Amphetamine, Cannabis, Cocaine,<br>Hallucinogen, Inhalant, Opioid, Phencyclidine, or<br>Other (or Unknown) Substance-Induced Psychotic        |

---

Disorder, With Delusions; Sedative, Hypnotic or Anxiolytic-Induced Psychotic Disorder, With Delusions

292.12 Amphetamine, Cannabis, Cocaine, Hallucinogen, Inhalant, Opioid, Phencyclidine, or Other (or Unknown)] Substance-Induced Psychotic Disorder, With Hallucinations; Sedative-, Hypnotic- or Anxiolytic-Induced Psychotic Disorder, With Hallucinations

292.2 PATHOLOGIC DRUG INTOX

292.8 OTHER DRUG MENTAL DIS\*

292.81 Amphetamine, Cannabis, Cocaine, Hallucinogen, Inhalant, Opioid, Phencyclidine, or Other (or Unknown)] Substance Intoxication Delirium; Sedative, Hypnotic or Anxiolytic Intoxication or Withdrawal Delirium

292.82 Inhalant or Other (or Unknown) Substance-Induced Persisting Dementia; Sedative-, Hypnotic- or Anxiolytic-Induced Persisting Dementia

292.83 Other (or Unknown)] Substance-Induced Persisting Amnestic Disorder; Sedative-, Hypnotic- or Anxiolytic-Induced Persisting Amnestic Disorder

292.84 Amphetamine, Cocaine, Hallucinogen, Inhalant, Opioid, Phencyclidine, or Other (or Unknown) Substance-Induced Mood Disorder; Sedative-, Hypnotic- or Anxiolytic-Induced Mood Disorder

292.85 Amphetamine, Caffeine, Cocaine, Opioid, or Other (or Unknown) Substance-Induced Sleep Disorder, Sedative-, Hypnotic- or Anxiolytic-Induced Sleep Disorder

292.89 Substance-Induced Anxiety Disorder, Sexual Dysfunction, Sleep Disorder, or Intoxication (Refer to the DSM-IV-TR); Hallucinogen Persisting Perception Disorder

292.9 Amphetamine, Caffeine, Cannabis, Cocaine, Hallucinogen, Inhalant, Nicotine, Opioid, Phencyclidine, or Other (or Unknown) Substance-Related Disorder NOS; Sedative-, Hypnotic- or Anxiolytic-Related Disorder NOS
